# Supplementary material
Source: Springer Nature journal article supplement (https://www.springermedizin.de/resource/supplementary/12936_2014_3578_MOESM1_ESM.pdf/9545960)
Supplement: MOESM1 [file 9545960]

## Quinine

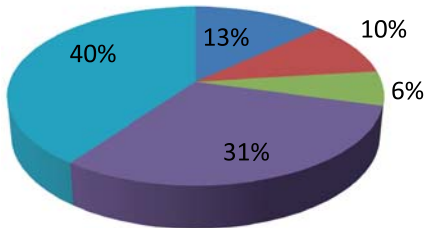

Medication

Intravenous fluid

Disposables

Laboratory tests

Services

## Artesunate

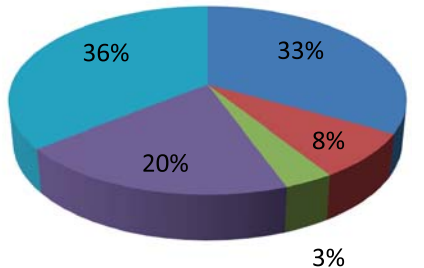

Medication

Intravenous fluid

Disposables

Laboratory tests

Services
